# Supplementary material
Source: publisher site journal article supplement (https://www.dovepress.com/article/465411)
Supplement: Supplementary file 1 [file get_supplementary_file.php]

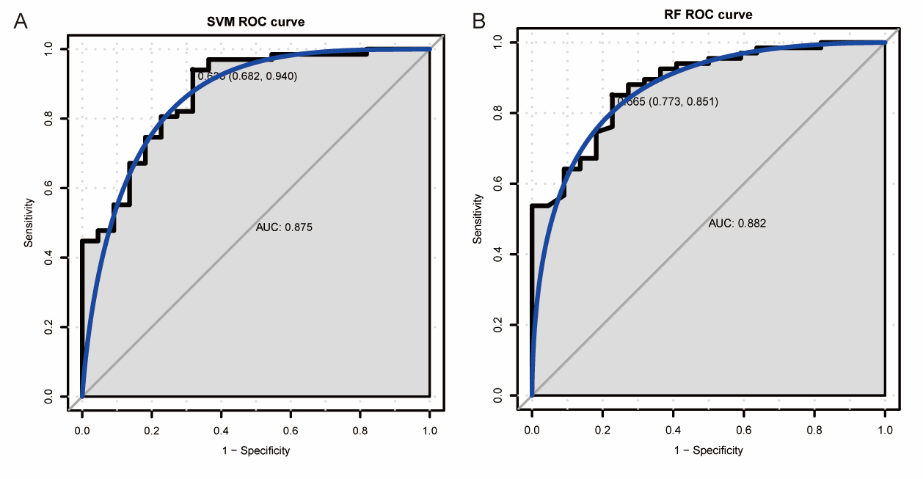


**Supplementary Figure 1**

ROC analysis of SVM (A) and RF (B) diagnostic models in the GSE123342 dataset.

**Supplementary Table 1: Clinical information and hypertension history**

| Group | Number | Age | Gender | BMI (kg/m2) | Smoking | Hypertension | Diabetes | Stroke | CK-MB | I/T |
| --- | --- | --- | --- | --- | --- | --- | --- | --- | --- | --- |
| 1 | 1 | 56 | Female | 19.88 | No | No | No | No |  | ＜0.0015 |
| 1 | 2 | 69 | Female | 21.78 | No | Yes | No | No |  | ＜0.025 |
| 1 | 3 | 35 | Male | 26.31 | No | No | No | No |  | ＜0.025 |
| 1 | 4 | 58 | Female | 29.30 | No | No | Yes | No |  | ＜0.025 |
| 1 | 5 | 40 | Female | 22.03 | No | Yes | No | No |  | 0.0027 |
| 1 | 6 | 69 | Female | 21.78 | No | Yes | No | No |  | ＜0.025 |
| 2 | 7 | 44 | Male | 24.8 | No | No | No | No | 50.86 | ＜0.1 |
| 2 | 8 | 57 | Male | 32.7 | Yes | Yes | No | Yes | 1.11 | 86.103 |
| 2 | 9 | 44 | Male | 26 | No | No | No | No | 2.29 | ＜0.1 |
| 2 | 10 | 69 | Female | 18.7 | No | No | No | No |  | ＜0.03 |
| 2 | 11 | 80 | Male | 21.8 | No | Yes | No | No | 21.72 | ＜0.1 |

1: Stable coronary artery disease group, 2: Myocardial infarction group, BMI: Body Mass Index, CK-MB: Creatine Kinase-MB, I/T: Troponin I/ Troponin T

**Supplementary Table 2: Primer sequences**

| Name | Species | Forward primer | Reverse primer |
| --- | --- | --- | --- |
| COLGALT1 | Human | TCAACCCTGACACACTGAGC | CACCATGGGAACTGCAAAGC |
| β-ACTIN | Human | CATGTACGTTGCTATCCAGGC | CTCCTTAATGTCACGCACGAT |
| LRPAP1 | Human | CGGAGGGTCAGGTCGTTTC | CAACTTCTCCATGCGGAACTC |
| PLAUR | Human | TGTAAGACCAACGGGGATTGC | AGCCAGTCCGATAGCTCAGG |
| PLOD1 | Human | CAAGAGGTTCCTGGGCTCTG | CCTCATCCAAGGCTCCATCC |
| QSOX1 | Human | ATCCAGGTCCTTCTATACCGC | GTTGGTGCAACTGTGGTCTG |
| THBD | Human | TCCTCTGCGAGTTCCACTTC | GCCGTAGGTGATCGAGACG |
| VCAN | Human | GAAGGCTTGTTTGGACGTTGG | ACGGAATCCATAAGTCCTGACTC |
